# Supplementary material
Source: PubMed Central journal article supplement (PMC6104805)
Supplement: NIHMS77017-supplement-Supplementary_table_1.pdf [file NIHMS77017-supplement-Supplementary_table_1.pdf]

**Supplemental Table 1. Study population characteristics.**

|                             | <b>Discovery</b> | <b>Replication</b> |
|-----------------------------|------------------|--------------------|
| n                           | 786              | 230                |
| Zygoty<br>(MZ/DZ/Singleton) | 296/310/180      | 0/110/120          |
| Age                         | 65.2 ± 7.6       | 66.9 ± 8.6         |
| Gender (female)             | 734 (93.4%)      | 226 (98.3%)        |
| BMI                         | 26.1 ± 4.7       | 27.2 ± 5.2         |
